# Supplementary material for: On the possibility of an Eley–Rideal mechanism for ammonia synthesis on Mn6N5+x (x = 1)-(111) surfaces
Source: Royal Society of Chemistry journal article supplement (doi:10.1039/c8cp02381f), 2018-01-01
Supplement: c8cp02381f1.pdf [file c8cp02381f1.pdf]

## Supporting Information

### On the possibility of an Eley-Rideal mechanism for ammonia synthesis on $\text{Mn}_6\text{N}_{5+x}$ ( $x=1$ )-(111) surfaces

Constantinos D. Zeinalipour-Yazdi

*Department of Chemistry, University College London, 20 Gordon Street, London, WC1H 0AJ, UK*

*UK Catalysis Hub, Research Complex at Harwell, Rutherford Appleton Labs, Harwell Campus, OX11 0FA, UK*

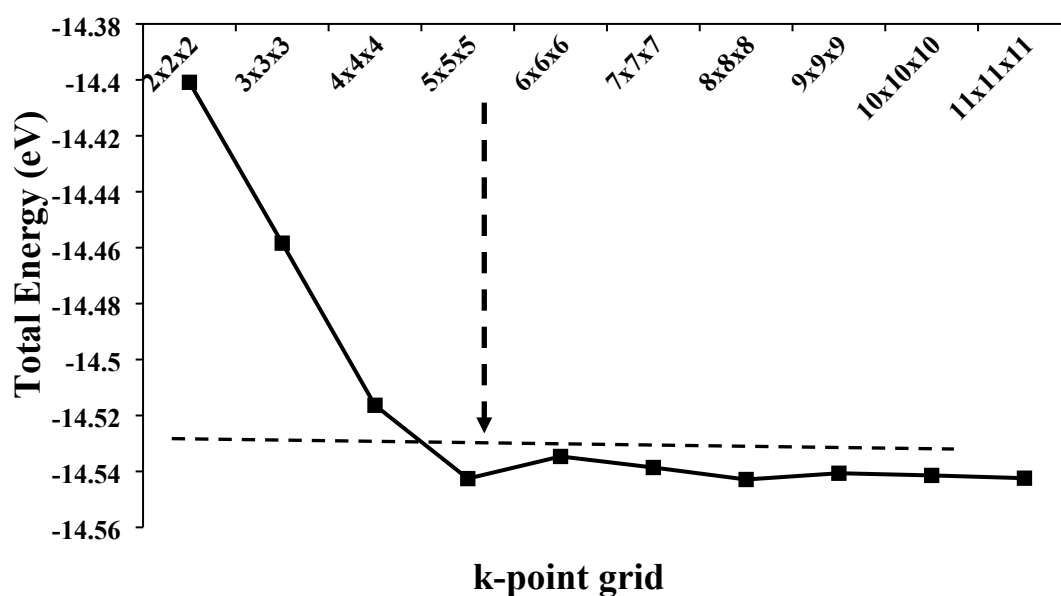

**S-Fig. 1** Bulk  $\theta$ - $\text{Mn}_6\text{N}_5$  convergence of energy as a function of k-point grid density.

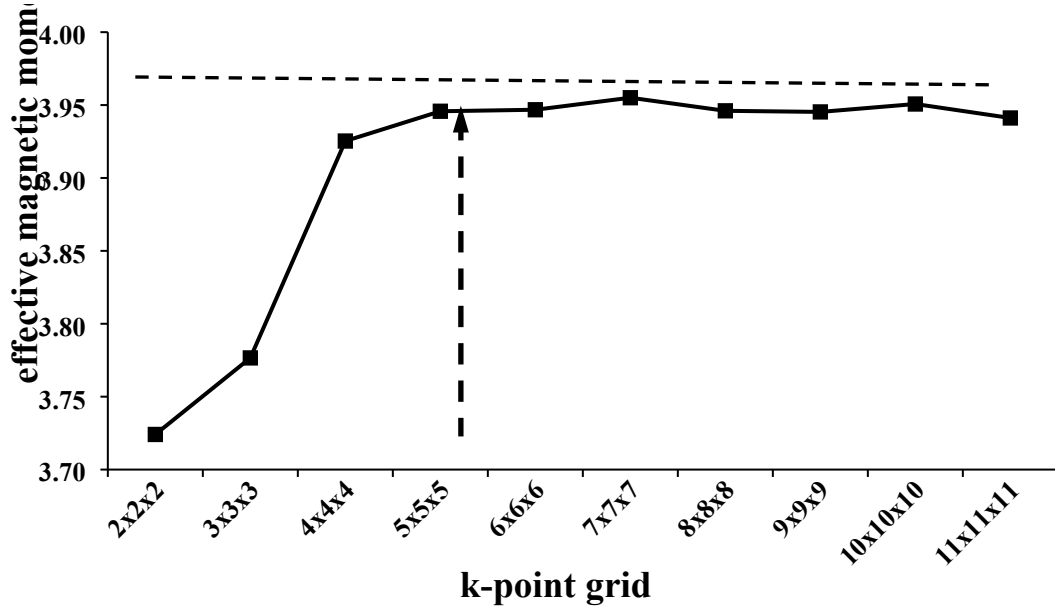

**S-Fig. 2** Bulk  $\theta$ -Mn<sub>6</sub>N<sub>5</sub> convergence of effective magnetic moment as a function of MP k-point grid density.

Based on the convergence observed of the k-point grid and the effective magnetic moment per manganese atom observed for the bulk  $\theta$ -Mn<sub>6</sub>N<sub>5</sub> we have calculated the k-point grid for the various slabs of this material. These are shown in the following table.

**S-Table 1.** k-point grid used to model the various surface slabs of  $\theta$ -Mn<sub>6</sub>N<sub>5</sub>

| k-points | Surface  |
|----------|----------|
| 3x3x1    | 1 0 0    |
| 2x2x1    | 1 1 1    |
| 2x2x1    | (1 1 1)' |
| 3x2x1    | 1 1 0    |
